# Supplementary material for: Communities of Endophytic Sebacinales Associated with Roots of Herbaceous Plants in Agricultural and Grassland Ecosystems Are Dominated by Serendipita herbamans sp. nov
Source: PLoS One. 2014 Apr 17;9(4):e94676. doi: 10.1371/journal.pone.0094676 (PMC3990532; doi:10.1371/journal.pone.0094676)
Supplement: Table S1 — Plant species yielding the sebacinoid endophytes detected in this study. The respective land use category, type of farming/grassland, host plant species, host plant family, sample date, sample location, collector(s), Herbarium Tubingense (TUB) number, GenBank accession number, Sebacinales molecular operational taxonomic unit (MOTU)/species, haplotype designation, sequence source and morphological detection are given. Plant samples TUB 019485–019567 were processed by D. Kuhn in the context of her Diploma thesis. (XLS) [file pone.0094676.s001.xls]

## Sheet: Tabelle1
Land use category	Habitats sampled	Host plant species	Host plant family	Sample date	Location	Collected by	TUB voucher	GenBank acc. no.	MOTU	Haplotype(s)	Sequence source	Morphological detection
adjected meadows	triticale & pea field, organic farming	Trifolium pratense L.	Fabaceae	March 2009	Tübingen	K. Riess, S. Garnica	19193	GU189681	3		this study
adjected meadows	triticale & pea field, organic farming	Poaceae sp.	Poaceae	March 2009	Tübingen	K. Riess, S. Garnica	19190	GU189680	8		this study
adjected meadows	triticale & pea field, organic farming	Poa trivialis L.	Poaceae	May 2009	Tübingen	K. Riess, S. Garnica	19268	GU189696	12		this study
adjected meadows	triticale & pea field, organic farming	Plantago lanceolata L.	Plantaginaceae	May 2009	Tübingen	K. Riess, S. Garnica	19220	GU189697	14	1	this study
adjected meadows	triticale & pea field, organic farming	Pisum sativum L.	Fabaceae	March 2009	Tübingen	K. Riess, S. Garnica	19197	GU189700	14	1, 1	this study
adjected meadows	triticale & pea field, organic farming	Pisum sativum L.	Fabaceae	May 2009	Tübingen	K. Riess, S. Garnica	19219	GU189687	14	1, 1	this study
adjected meadows	triticale & pea field, organic farming	Lolium perenne L.	Poaceae	March 2009	Tübingen	K. Riess, S. Garnica	19191	GU189679	14	1, 1	this study
adjected meadows	triticale & pea field, organic farming	Lolium perenne L.	Poaceae	May 2009	Tübingen	K. Riess, S. Garnica	19262	GU189690	14	1, 1	this study
adjected meadows	triticale & pea field, organic farming	Poaceae sp.	Poaceae	March 2009	Tübingen	K. Riess, S. Garnica	19192	GU189702	14	1, 1	this study
adjected meadows	triticale & pea field, organic farming	Poaceae sp.	Poaceae	March 2009	Tübingen	K. Riess, S. Garnica	19194	GU189684	14	1, 1	this study
adjected meadows	triticale & pea field, organic farming	Poaceae sp.	Poaceae	May 2009	Tübingen	K. Riess, S. Garnica	19266	GU189698	14	1, 1	this study
adjected meadows	triticale field, conventionell farming	Cerastium cf. holosteoides	Caryophyllaceae	May 2009	Dußlingen	K. Riess, S. Garnica	19254	GU189747	2		this study
adjected meadows	triticale field, conventionell farming	x Triticosecale Wittm. ex A. Camus	Poaceae	May 2009	Dußlingen	K. Riess, S. Garnica	19260	GU189744	2		this study
adjected meadows	triticale field, conventionell farming	Cerastium cf. holosteoides	Caryophyllaceae	May 2009	Dußlingen	K. Riess, S. Garnica	19257	GU189745	8		this study
adjected meadows	triticale field, conventionell farming	Elymus repens (L.) Gould	Poaceae	May 2009	Dußlingen	K. Riess, S. Garnica	19269	GU189746	14	1, 6	this study
adjected meadows	wheat field, conventionell farming	Myosotis arvensis (L.) Hill	Boraginaceae	March 2009	Tübingen	K. Riess, S. Garnica	19202	GU189718	3		this study
adjected meadows	wheat field, conventionell farming	Poa annua L.	Poaceae	May 2009	Tübingen	K. Riess, S. Garnica	19261	GU189725	3		this study
adjected meadows	wheat field, conventionell farming	Poaceae sp.	Poaceae	March 2009	Tübingen	K. Riess, S. Garnica	19203	GU189722	3		this study
adjected meadows	wheat field, conventionell farming	Elymus repens (L.) Gould	Poaceae	May 2009	Tübingen	K. Riess, S. Garnica	19267	GU189719	8		this study
adjected meadows	wheat field, conventionell farming	Plantago major L.	Plantaginaceae	May 2009	Tübingen	K. Riess, S. Garnica	19225	GU189728	14	1, 1	this study
adjected meadows	wheat field, conventionell farming	Poa annua L.	Poaceae	May 2009	Tübingen	K. Riess, S. Garnica	19226	GU189724	14	1, 1	this study
adjected meadows	wheat field, conventionell farming	Veronica persica Poir.	Plantaginaceae	March 2009	Tübingen	K. Riess, S. Garnica	19206	GU189716	14	1, 6	this study
adjected meadows	wheat field, conventionell farming	Poa annua L.	Poaceae	May 2009	Tübingen	K. Riess, S. Garnica	19224	GU189727	14	1, 6	this study
adjected meadows	wheat field, conventionell farming	Poa annua L.	Poaceae	March 2009	Tübingen	K. Riess, S. Garnica	19205	GU189717	14	3, 3	this study
adjected meadows	wheat field, no-till farming	Arabis hirsuta (L.) Scop.	Brassicaceae	May 2009	Rottenburg	K. Riess, S. Garnica	19221	GU189742	1		this study
adjected meadows	wheat field, no-till farming	Cerastium cf. holosteoides	Caryophyllaceae	May 2009	Rottenburg	K. Riess, S. Garnica	19255	GU189730	1		this study
adjected meadows	wheat field, no-till farming	Cerastium cf. holosteoides	Caryophyllaceae	May 2009	Rottenburg	K. Riess, S. Garnica	19256	GU189739	10		this study
adjected meadows	wheat field, no-till farming	Cerastium cf. holosteoides	Caryophyllaceae	May 2009	Rottenburg	K. Riess, S. Garnica	19258	GU189738	10		this study
adjected meadows	wheat field, no-till farming	Poaceae sp.	Poaceae	May 2009	Rottenburg	K. Riess, S. Garnica	19207	GU189743	13		this study
adjected meadows	wheat field, no-till farming	Cerastium cf. holosteoides	Caryophyllaceae	May 2009	Rottenburg	K. Riess, S. Garnica	19259	GU189740	14	1	this study
adjected meadows	wheat field, no-till farming	Medicago lupulina L.	Fabaceae	May 2009	Rottenburg	K. Riess, S. Garnica	19241	GU189733	14	1	this study
adjected meadows	wheat field, no-till farming	Cerastium cf. holosteoides	Caryophyllaceae	May 2009	Rottenburg	K. Riess, S. Garnica	19252	GU189736	14	1, 1	this study
adjected meadows	wheat field, no-till farming	Veronica persica Poir.	Plantaginaceae	May 2009	Rottenburg	K. Riess, S. Garnica	19251	GU189741	14	1, 1	this study
adjected meadows	wheat field, no-till farming	Ranunculus bulbosus L.	Ranunculaceae	May 2009	Rottenburg	K. Riess, S. Garnica	19208	GU189734	14	1, 1	this study
adjected meadows	wheat field, organic farming	Poaceae sp.	Poaceae	March 2009	Tübingen	K. Riess, S. Garnica	19200	GU189705	5		this study
adjected meadows	wheat field, organic farming	Lamium purpureum L.	Lamiaceae	May 2009	Tübingen	K. Riess, S. Garnica	19222	GU189713	14	1, 1	this study
adjected meadows	wheat field, organic farming	Plantago lanceolata L.	Plantaginaceae	March 2009	Tübingen	K. Riess, S. Garnica	19201	GU189712	14	1, 1	this study
adjected meadows	wheat field, organic farming	Lolium perenne L.	Poaceae	May 2009	Tübingen	K. Riess, S. Garnica	19265	GU189714	14	11, 11	this study
agricultural habitats	barley field, conventionell farming	Hordeum vulgare L.	Poaceae	August 2013	Rottenburg	K. Riess, S. Garnica	20334	KF779475	14	1, 1	this study
agricultural habitats	maize field, conventionell farming	Matricaria chamomilla L.	Asteraceae	August 2013	Tübingen	K. Riess, S. Garnica	20333	KF779474	6		this study
agricultural habitats	sunflower field, conventionell farming	Helianthus annuus L.	Asteraceae	August 2013	Tübingen	K. Riess, S. Garnica	20332	KF779473	9		this study
agricultural habitats	triticale & pea field, organic farming	x Triticosecale Wittm. ex A. Camus	Poaceae	May 2009	Tübingen	K. Riess, S. Garnica	19211	GU189685	4		this study
agricultural habitats	triticale & pea field, organic farming	Lamium purpureum L.	Lamiaceae	May 2009	Tübingen	K. Riess, S. Garnica	19230	GU189703	5		this study
agricultural habitats	triticale & pea field, organic farming	x Triticosecale Wittm. ex A. Camus	Poaceae	March 2009	Tübingen	K. Riess, S. Garnica	19187	GU189693	8		this study
agricultural habitats	triticale & pea field, organic farming	x Triticosecale Wittm. ex A. Camus	Poaceae	March 2009	Tübingen	K. Riess, S. Garnica	19188	GU189699	8		this study
agricultural habitats	triticale & pea field, organic farming	Potentilla anserina L.	Rosaceae	May 2009	Tübingen	K. Riess, S. Garnica	19218	GU189689	8		this study
agricultural habitats	triticale & pea field, organic farming	Alopecurus myosuroides Huds.	Poaceae	May 2009	Tübingen	K. Riess, S. Garnica	19216	GU189694	13		this study
agricultural habitats	triticale & pea field, organic farming	x Triticosecale Wittm. ex A. Camus	Poaceae	May 2009	Tübingen	K. Riess, S. Garnica	19212	GU189692	13		this study
agricultural habitats	triticale & pea field, organic farming	Veronica persica Poir.	Plantaginaceae	May 2009	Tübingen	K. Riess, S. Garnica	19249	GU189682	14	1	this study
agricultural habitats	triticale & pea field, organic farming	Veronica persica Poir.	Plantaginaceae	May 2009	Tübingen	K. Riess, S. Garnica	19250	GU189683	14	1	this study
agricultural habitats	triticale & pea field, organic farming	Stellaria media (L.) Vill.	Caryophyllaceae	May 2009	Tübingen	K. Riess, S. Garnica	19215	GU189686	14	12	this study
agricultural habitats	triticale & pea field, organic farming	Pisum sativum L.	Fabaceae	March 2009	Tübingen	K. Riess, S. Garnica	19189	GU189701	14	1, 1	this study
agricultural habitats	triticale & pea field, organic farming	Plantago lanceolata L.	Plantaginaceae	May 2009	Tübingen	K. Riess, S. Garnica	19220	GU189691	14	1, 1	this study
agricultural habitats	triticale & pea field, organic farming	x Triticosecale Wittm. ex A. Camus	Poaceae	May 2009	Tübingen	K. Riess, S. Garnica	19213	GU189688	14	1, 1	this study
agricultural habitats	wheat field, conventionell farming	Triticum aestivum L.	Poaceae	May 2009	Tübingen	K. Riess, S. Garnica	19223	GU189723	13		this study
agricultural habitats	wheat field, conventionell farming	Triticum aestivum L.	Poaceae	May 2009	Tübingen	K. Riess, S. Garnica	19245	GU189715	14	1	this study
agricultural habitats	wheat field, conventionell farming	Trifolium repens L.	Fabaceae	May 2009	Tübingen	K. Riess, S. Garnica	19248	GU189720	14	1, 1	this study
agricultural habitats	wheat field, conventionell farming	Cirsium arvense (L.) Scop.	Asteraceae	May 2009	Tübingen	K. Riess, S. Garnica	19242	GU189726	14	1, 6	this study
agricultural habitats	wheat field, no-till farming	Veronica persica Poir.	Plantaginaceae	May 2009	Rottenburg	K. Riess, S. Garnica	19239	GU189731	13		this study
agricultural habitats	wheat field, no-till farming	Galium mollugo L.	Rubiaceae	May 2009	Rottenburg	K. Riess, S. Garnica	19240	GU189732	14	1, 1	this study
agricultural habitats	wheat field, organic farming	Triticum aestivum L.	Poaceae	May 2009	Tübingen	K. Riess, S. Garnica	19228	GU189709	5		this study
agricultural habitats	wheat field, organic farming	Triticum aestivum L.	Poaceae	May 2009	Tübingen	K. Riess, S. Garnica	19237	GU189710	5		this study
agricultural habitats	wheat field, organic farming	Triticum aestivum L.	Poaceae	May 2009	Tübingen	K. Riess, S. Garnica	19238	GU189711	7		this study
agricultural habitats	wheat field, organic farming	Elymus repens (L.) Gould	Poaceae	May 2009	Tübingen	K. Riess, S. Garnica	19263	GU189704	8		this study
agricultural habitats	wheat field, organic farming	Triticum aestivum L.	Poaceae	May 2009	Tübingen	K. Riess, S. Garnica	19227	GU189708	13		this study
agricultural habitats	wheat field, organic farming	Triticum aestivum L.	Poaceae	March 2009	Tübingen	K. Riess, S. Garnica	19198	GU189706	14	1, 1	this study
agricultural habitats	wheat field, organic farming	Triticum aestivum L.	Poaceae	March 2009	Tübingen	K. Riess, S. Garnica	19199	GU189707	14	9, 9	this study	yes
grassland habitats	hay meadow	Trifolium repens L.	Fabaceae	May 2010	Mössingen	D. Kuhn, S. Garnica	19492	HQ180276	11		this study
grassland habitats	hay meadow	Trifolium repens L.	Fabaceae	May 2010	Mössingen	D. Kuhn, S. Garnica	19493	HQ180277	11		this study
grassland habitats	hay meadow	Glechoma hederacea L.	Lamiaceae	May 2010	Mössingen	D. Kuhn, S. Garnica	19496	HQ180280	11		this study
grassland habitats	hay meadow	Glechoma hederacea L.	Lamiaceae	May 2010	Mössingen	D. Kuhn, S. Garnica	19497	HQ180281	11		this study
grassland habitats	hay meadow	Trifolium pratense L.	Fabaceae	May 2010	Gönningen	D. Kuhn, S. Garnica	19540	HQ180325	14	1	this study
grassland habitats	hay meadow	Trifolium repens L.	Fabaceae	May 2010	Mössingen	D. Kuhn, S. Garnica	19485	HQ180269	14	1	this study
grassland habitats	hay meadow	Glechoma hederacea L.	Lamiaceae	May 2010	Tübingen	D. Kuhn, S. Garnica	19494	HQ180278	14	1	this study
grassland habitats	hay meadow	Glechoma hederacea L.	Lamiaceae	May 2010	Mössingen	D. Kuhn, S. Garnica	19495	HQ180279	14	1	this study
grassland habitats	hay meadow	Ranunculus acris L.	Ranunculaceae	June 2008	Tübingen	C. Krause, S. Garnica	11776	EU910938	14	1	this study
grassland habitats	hay meadow	Vicia sepium L.	Fabaceae	May 2010	Mössingen	D. Kuhn, S. Garnica	19543	HQ180328	14	1, 1	this study
grassland habitats	hay meadow	Plantago lanceolata L.	Plantaginaceae	May 2010	Mössingen	D. Kuhn, S. Garnica	19486	HQ180270	14	1, 1	this study
grassland habitats	hay meadow	Ranunculus repens L.	Ranunculaceae	June 2008	Tübingen	C. Krause, S. Garnica	11742	EU910904	14	1, 10	this study
grassland habitats	poor grassland	Trifolium pratense L.	Fabaceae	June 2010	Gönningen	D. Kuhn, S. Garnica	19567	HQ180295	8		this study
grassland habitats	poor grassland	Trifolium pratense L.	Fabaceae	June 2010	Mössingen	D. Kuhn, S. Garnica	19491	HQ180275	11		this study
grassland habitats	poor grassland	Lathyrus pratensis L.	Fabaceae	May 2010	Tübingen	D. Kuhn, S. Garnica	19535	HQ180320	14	1	this study
grassland habitats	poor grassland	Lotus corniculatus L.	Fabaceae	May 2010	Tübingen	D. Kuhn, S. Garnica	19536	HQ180321	14	1	this study
grassland habitats	poor grassland	Medicago lupulina L.	Fabaceae	June 2008	Tübingen	C. Krause, S. Garnica	11747	EU910909	14	1	this study
grassland habitats	poor grassland	Medicago lupulina L.	Fabaceae	June 2010	Gönningen	D. Kuhn, S. Garnica	19523	HQ180308	14	1	this study
grassland habitats	poor grassland	Medicago lupulina L.	Fabaceae	June 2010	Gönningen	D. Kuhn, S. Garnica	19563	HQ180348	14	1	this study
grassland habitats	poor grassland	Medicago lupulina L.	Fabaceae	June 2010	Gönningen	D. Kuhn, S. Garnica	19564	HQ180349	14	1	this study
grassland habitats	poor grassland	Medicago lupulina L.	Fabaceae	June 2010	Gönningen	D. Kuhn, S. Garnica	19565	HQ180350	14	1	this study
grassland habitats	poor grassland	Onobrychis viciifolia Scop.	Fabaceae	June 2010	Mössingen	D. Kuhn, S. Garnica	19542	HQ180327	14	1	this study
grassland habitats	poor grassland	Trifolium pratense L.	Fabaceae	June 2010	Mössingen	D. Kuhn, S. Garnica	19490	HQ180274	14	1	this study
grassland habitats	poor grassland	Trifolium pratense L.	Fabaceae	June 2010	Gönningen	D. Kuhn, S. Garnica	19507	HQ180291	14	1	this study
grassland habitats	poor grassland	Trifolium pratense L.	Fabaceae	June 2010	Gönningen	D. Kuhn, S. Garnica	19509	HQ180293	14	1	this study
grassland habitats	poor grassland	Trifolium pratense L.	Fabaceae	June 2010	Gönningen	D. Kuhn, S. Garnica	19510	HQ180294	14	1	this study
grassland habitats	poor grassland	Trifolium pratense L.	Fabaceae	May 2010	Tübingen	D. Kuhn, S. Garnica	19539	HQ180324	14	1	this study
grassland habitats	poor grassland	Trifolium pratense L.	Fabaceae	June 2010	Gönningen	D. Kuhn, S. Garnica	19560	HQ180345	14	1	this study
grassland habitats	poor grassland	Trifolium repens L. clone H10	Fabaceae	June 2010	Gönningen	D. Kuhn, S. Garnica	19506	HQ180290	14	1	this study
grassland habitats	poor grassland	Trifolium repens L. clone H11	Fabaceae	June 2010	Gönningen	D. Kuhn, S. Garnica	19505	HQ180289	14	1	this study
grassland habitats	poor grassland	Vicia cracca L.	Fabaceae	June 2008	Tübingen	C. Krause, S. Garnica	11753	EU910915	14	1	this study
grassland habitats	poor grassland	Glechoma hederacea L.	Lamiaceae	May 2010	Tübingen	D. Kuhn, S. Garnica	19538	HQ180323	14	1	this study
grassland habitats	poor grassland	Plantago lanceolata L.	Plantaginaceae	June 2010	Mössingen	D. Kuhn, S. Garnica	19487	HQ180271	14	1	this study
grassland habitats	poor grassland	Plantago lanceolata L.	Plantaginaceae	June 2010	Mössingen	D. Kuhn, S. Garnica	19488	HQ180272	14	1	this study
grassland habitats	poor grassland	Plantago lanceolata L.	Plantaginaceae	June 2010	Mössingen	D. Kuhn, S. Garnica	19489	HQ180273	14	1	this study
grassland habitats	poor grassland	Plantago lanceolata L.	Plantaginaceae	June 2010	Gönningen	D. Kuhn, S. Garnica	19498	HQ180282	14	1	this study
grassland habitats	poor grassland	Plantago lanceolata L.	Plantaginaceae	June 2010	Gönningen	D. Kuhn, S. Garnica	19501	HQ180285	14	1	this study
grassland habitats	poor grassland	Plantago lanceolata L.	Plantaginaceae	May 2010	Tübingen	D. Kuhn, S. Garnica	19544	HQ180329	14	1	this study
grassland habitats	poor grassland	Plantago media L.	Plantaginaceae	June 2010	Gönningen	D. Kuhn, S. Garnica	19554	HQ180339	14	1	this study
grassland habitats	poor grassland	Ranunculus bulbosus L.	Ranunculaceae	June 2010	Gönningen	D. Kuhn, S. Garnica	19512	HQ180297	14	1	this study
grassland habitats	poor grassland	Ranunculus bulbosus L.	Ranunculaceae	June 2010	Gönningen	D. Kuhn, S. Garnica	19516	HQ180301	14	1	this study
grassland habitats	poor grassland	Ranunculus bulbosus L.	Ranunculaceae	June 2010	Gönningen	D. Kuhn, S. Garnica	19517	HQ180302	14	1	this study
grassland habitats	poor grassland	Ranunculus bulbosus L.	Ranunculaceae	June 2010	Gönningen	D. Kuhn, S. Garnica	19519	HQ180304	14	1	this study
grassland habitats	poor grassland	Ranunculus bulbosus L.	Ranunculaceae	June 2010	Gönningen	D. Kuhn, S. Garnica	19520	HQ180305	14	1	this study
grassland habitats	poor grassland	Ranunculus bulbosus L.	Ranunculaceae	June 2010	Gönningen	D. Kuhn, S. Garnica	19524	HQ180309	14	1	this study
grassland habitats	poor grassland	Ranunculus bulbosus L.	Ranunculaceae	June 2010	Gönningen	D. Kuhn, S. Garnica	19526	HQ180311	14	1	this study
grassland habitats	poor grassland	Ranunculus bulbosus L.	Ranunculaceae	June 2010	Gönningen	D. Kuhn, S. Garnica	19528	HQ180313	14	1	this study
grassland habitats	poor grassland	Ranunculus bulbosus L.	Ranunculaceae	June 2010	Gönningen	D. Kuhn, S. Garnica	19530	HQ180315	14	1	this study
grassland habitats	poor grassland	Ranunculus bulbosus L.	Ranunculaceae	June 2010	Gönningen	D. Kuhn, S. Garnica	19531	HQ180316	14	1	this study
grassland habitats	poor grassland	Ranunculus bulbosus L.	Ranunculaceae	June 2010	Gönningen	D. Kuhn, S. Garnica	19532	HQ180317	14	1	this study
grassland habitats	poor grassland	Ranunculus bulbosus L.	Ranunculaceae	June 2010	Gönningen	D. Kuhn, S. Garnica	19533	HQ180318	14	1	this study
grassland habitats	poor grassland	Ranunculus bulbosus L.	Ranunculaceae	June 2010	Gönningen	D. Kuhn, S. Garnica	19534	HQ180319	14	1	this study
grassland habitats	poor grassland	Lotus corniculatus L.	Fabaceae	May 2010	Tübingen	D. Kuhn, S. Garnica	19537	HQ180322	14	1, 1	this study
grassland habitats	poor grassland	Medicago lupulina L.	Fabaceae	June 2010	Gönningen	D. Kuhn, S. Garnica	19522	HQ180307	14	1, 1	this study
grassland habitats	poor grassland	Medicago lupulina L.	Fabaceae	June 2010	Gönningen	D. Kuhn, S. Garnica	19566	HQ180351	14	1, 1	this study
grassland habitats	poor grassland	Trifolium pratense L.	Fabaceae	June 2010	Gönningen	D. Kuhn, S. Garnica	19508	HQ180292	14	1, 1	this study
grassland habitats	poor grassland	Trifolium pratense L.	Fabaceae	June 2010	Gönningen	D. Kuhn, S. Garnica	19511	HQ180296	14	1, 1	this study
grassland habitats	poor grassland	Trifolium pratense L.	Fabaceae	June 2010	Gönningen	D. Kuhn, S. Garnica	19557	HQ180342	14	1, 1	this study
grassland habitats	poor grassland	Trifolium pratense L.	Fabaceae	June 2010	Gönningen	D. Kuhn, S. Garnica	19558	HQ180343	14	1, 1	this study
grassland habitats	poor grassland	Trifolium pratense L.	Fabaceae	June 2010	Gönningen	D. Kuhn, S. Garnica	19559	HQ180344	14	1, 1	this study
grassland habitats	poor grassland	Vicia cracca L.	Fabaceae	June 2008	Tübingen	C. Krause, S. Garnica	11751	EU910913	14	1, 1	this study
grassland habitats	poor grassland	Thymus pulegioides L.	Lamiaceae	June 2010	Mössingen	D. Kuhn, S. Garnica	19541	HQ180326	14	1, 1	this study
grassland habitats	poor grassland	Plantago lanceolata L.	Plantaginaceae	June 2010	Gönningen	D. Kuhn, S. Garnica	19499	HQ180283	14	1, 1	this study
grassland habitats	poor grassland	Plantago lanceolata L.	Plantaginaceae	June 2010	Gönningen	D. Kuhn, S. Garnica	19500	HQ180284	14	1, 1	this study
grassland habitats	poor grassland	Plantago lanceolata L.	Plantaginaceae	June 2010	Gönningen	D. Kuhn, S. Garnica	19502	HQ180286	14	1, 1	this study
grassland habitats	poor grassland	Plantago lanceolata L.	Plantaginaceae	June 2010	Gönningen	D. Kuhn, S. Garnica	19503	HQ180287	14	1, 1	this study
grassland habitats	poor grassland	Plantago lanceolata L.	Plantaginaceae	June 2010	Gönningen	D. Kuhn, S. Garnica	19504	HQ180288	14	1, 1	this study
grassland habitats	poor grassland	Plantago lanceolata L.	Plantaginaceae	May 2010	Tübingen	D. Kuhn, S. Garnica	19545	HQ180330	14	1, 1	this study
grassland habitats	poor grassland	Plantago lanceolata L.	Plantaginaceae	June 2010	Tübingen	D. Kuhn, S. Garnica	19548	HQ180333	14	1, 1	this study
grassland habitats	poor grassland	Plantago lanceolata L.	Plantaginaceae	June 2010	Mössingen	D. Kuhn, S. Garnica	19549	HQ180334	14	1, 1	this study
grassland habitats	poor grassland	Plantago media L.	Plantaginaceae	June 2008	Tübingen	C. Krause, S. Garnica	11735	EU910897	14	1, 1	this study
grassland habitats	poor grassland	Plantago media L.	Plantaginaceae	June 2010	Gönningen	D. Kuhn, S. Garnica	19552	HQ180337	14	1, 1	this study
grassland habitats	poor grassland	Plantago media L.	Plantaginaceae	June 2010	Gönningen	D. Kuhn, S. Garnica	19553	HQ180338	14	1, 1	this study
grassland habitats	poor grassland	Plantago media L.	Plantaginaceae	June 2010	Gönningen	D. Kuhn, S. Garnica	19555	HQ180340	14	1, 1	this study	yes
grassland habitats	poor grassland	Plantago media L.	Plantaginaceae	June 2010	Gönningen	D. Kuhn, S. Garnica	19556	HQ180341	14	1, 1	this study
grassland habitats	poor grassland	Bistorta officinalis (L.) Delarbre	Polygonaceae	July 2010	Bad Hindelang	K. Riess, S. Garnica	DSM 27534	KF061285	14	1, 1	this study
grassland habitats	poor grassland	Ranunculus bulbosus L.	Ranunculaceae	June 2010	Gönningen	D. Kuhn, S. Garnica	19513	HQ180298	14	1, 1	this study
grassland habitats	poor grassland	Ranunculus bulbosus L.	Ranunculaceae	June 2010	Gönningen	D. Kuhn, S. Garnica	19514	HQ180299	14	1, 1	this study
grassland habitats	poor grassland	Ranunculus bulbosus L.	Ranunculaceae	June 2010	Gönningen	D. Kuhn, S. Garnica	19515	HQ180300	14	1, 1	this study
grassland habitats	poor grassland	Ranunculus bulbosus L.	Ranunculaceae	June 2010	Gönningen	D. Kuhn, S. Garnica	19518	HQ180303	14	1, 1	this study
grassland habitats	poor grassland	Ranunculus bulbosus L.	Ranunculaceae	June 2010	Gönningen	D. Kuhn, S. Garnica	19521	HQ180306	14	1, 1	this study
grassland habitats	poor grassland	Ranunculus bulbosus L.	Ranunculaceae	June 2010	Gönningen	D. Kuhn, S. Garnica	19525	HQ180310	14	1, 1	this study
grassland habitats	poor grassland	Ranunculus bulbosus L.	Ranunculaceae	June 2010	Gönningen	D. Kuhn, S. Garnica	19527	HQ180312	14	1, 1	this study
grassland habitats	poor grassland	Ranunculus bulbosus L.	Ranunculaceae	June 2010	Gönningen	D. Kuhn, S. Garnica	19529	HQ180314	14	1, 1	this study
grassland habitats	poor grassland	Ranunculus bulbosus L.	Ranunculaceae	May 2010	Tübingen	D. Kuhn, S. Garnica	19547	HQ180332	14	1, 1	this study
grassland habitats	poor grassland	Ranunculus bulbosus L.	Ranunculaceae	June 2010	Mössingen	D. Kuhn, S. Garnica	19550	HQ180335	14	1, 1	this study
grassland habitats	poor grassland	Ranunculus bulbosus L.	Ranunculaceae	June 2010	Mössingen	D. Kuhn, S. Garnica	19551	HQ180336	14	1, 1	this study
grassland habitats	poor grassland	Ranunculus bulbosus L.	Ranunculaceae	June 2010	Gönningen	D. Kuhn, S. Garnica	19561	HQ180346	14	1, 1	this study
grassland habitats	poor grassland	Ranunculus bulbosus L.	Ranunculaceae	June 2010	Gönningen	D. Kuhn, S. Garnica	19562	HQ180347	14	1, 1	this study
grassland habitats	poor grassland	Plantago lanceolata L.	Plantaginaceae	May 2010	Tübingen	D. Kuhn, S. Garnica	19546	HQ180331	14	1, 2	this study
grassland habitats		Carlina acaulis L.	Asteraceae					HQ154236	14	1	Garnica et al. 2013 (MOTU 54)
grassland habitats		Homogyne alpina (L.) Cass.	Asteraceae					HQ154224	14	1	Garnica et al. 2013 (MOTU 54)
grassland habitats		Parnassia palustris L.	Celastraceae					HQ154235	14	1	Garnica et al. 2013 (MOTU 54)
grassland habitats		Trifolium badium Schreb.	Fabaceae					HQ154378	14	1	Garnica et al. 2013 (MOTU 54)
grassland habitats		Trifolium badium Schreb.	Fabaceae					HQ154379	14	1	Garnica et al. 2013 (MOTU 54)
grassland habitats		Trifolium badium Schreb.	Fabaceae					HQ154380	14	1	Garnica et al. 2013 (MOTU 54)
grassland habitats		Trifolium pratense L.	Fabaceae					HQ154259	14	1	Garnica et al. 2013 (MOTU 54)
grassland habitats		Trifolium pratense L.	Fabaceae					HQ154268	14	1	Garnica et al. 2013 (MOTU 54)
grassland habitats		Trifolium repens L.	Fabaceae					HQ154369	14	1	Garnica et al. 2013 (MOTU 54)
grassland habitats		Trifolium repens L.	Fabaceae					HQ154383	14	1	Garnica et al. 2013 (MOTU 54)
grassland habitats		Poaceae sp.	Poaceae					HQ154416	14	1	Garnica et al. 2013 (MOTU 54)
grassland habitats		Poaceae sp.	Poaceae					HQ154417	14	1	Garnica et al. 2013 (MOTU 54)
grassland habitats		Bistorta officinalis (L.) Delarbre	Polygonaceae					HQ154238	14	1	Garnica et al. 2013 (MOTU 54)
grassland habitats		Bistorta officinalis (L.) Delarbre	Polygonaceae					HQ154243	14	1	Garnica et al. 2013 (MOTU 54)
grassland habitats		Bistorta officinalis (L.) Delarbre	Polygonaceae					HQ154250	14	1	Garnica et al. 2013 (MOTU 54)
grassland habitats		Bistorta officinalis (L.) Delarbre	Polygonaceae					HQ154241	14	8	Garnica et al. 2013 (MOTU 54)
grassland habitats		Trifolium pratense L.	Fabaceae					HQ154217	14	1, 1	Garnica et al. 2013 (MOTU 54)
grassland habitats		Trifolium pratense L.	Fabaceae					HQ154255	14	1, 1	Garnica et al. 2013 (MOTU 54)
grassland habitats		Trifolium pratense L.	Fabaceae					HQ154260	14	1, 1	Garnica et al. 2013 (MOTU 54)
grassland habitats		Trifolium pratense L.	Fabaceae					HQ154269	14	1, 1	Garnica et al. 2013 (MOTU 54)
grassland habitats		Trifolium repens L.	Fabaceae					HQ154254	14	1, 1	Garnica et al. 2013 (MOTU 54)
grassland habitats		Gentianopsis ciliata (L.) Ma	Gentianaceae					HQ154292	14	1, 1	Garnica et al. 2013 (MOTU 54)
grassland habitats		Gentianopsis ciliata (L.) Ma	Gentianaceae					HQ154293	14	1, 1	Garnica et al. 2013 (MOTU 54)
grassland habitats		Luzula sylvatica (Huds.) Gaudin	Juncaceae					HQ154334	14	1, 1	Garnica et al. 2013 (MOTU 54)
grassland habitats		Bistorta officinalis (L.) Delarbre	Polygonaceae					HQ154245	14	1, 1	Garnica et al. 2013 (MOTU 54)
grassland habitats		Bistorta officinalis (L.) Delarbre	Polygonaceae					HQ154246	14	1, 1	Garnica et al. 2013 (MOTU 54)
grassland habitats		Ranunculus acris L.	Ranunculaceae					HQ154335	14	1, 1	Garnica et al. 2013 (MOTU 54)
grassland habitats		Potentilla anserina L.	Rosaceae					HQ154237	14	1, 1	Garnica et al. 2013 (MOTU 54)	yes
grassland habitats		Trifolium pratense L.	Fabaceae					HQ154258	14	1, 4	Garnica et al. 2013 (MOTU 54)
grassland habitats		Bistorta officinalis (L.) Delarbre	Polygonaceae					HQ154249	14	1, 4	Garnica et al. 2013 (MOTU 54)
grassland habitats		Trifolium repens L.	Fabaceae					HQ154266	14	1, 5	Garnica et al. 2013 (MOTU 54)
grassland habitats		Bistorta officinalis (L.) Delarbre	Polygonaceae					HQ154239	14	7, 8	Garnica et al. 2013 (MOTU 54)
grassland habitats		Rumex cf. acetosa	Polygonaceae					HQ154229	14	7, 8	Garnica et al. 2013 (MOTU 54)
(missing data)		Medicago lupulina L.	Fabaceae					EU910907	14		Weiß et al. 2011 (clade 4)
(missing data)		Medicago lupulina L.	Fabaceae					FJ556807	14		Weiß et al. 2011 (clade 4)
(missing data)		Vicia cracca L.	Fabaceae					EU910917	14		Weiß et al. 2011 (clade 4)
(missing data)		Vicia cracca L.	Fabaceae					EU910918	14		Weiß et al. 2011 (clade 4)
(missing data)		Plantago media L.	Plantaginaceae					EU910903	14		Weiß et al. 2011 (clade 4)
(missing data)		Veronica persica Poir.	Plantaginaceae					EU910900	14		Weiß et al. 2011 (clade 4)
(missing data)		Dactylis glomerata L.	Poaceae					EU910935	14		Weiß et al. 2011 (clade 4)
(missing data)		Triticum aestivum L.	Poaceae					EU910899	14		Weiß et al. 2011 (clade 4)
