# Supplementary material for: Communities of Endophytic Sebacinales Associated with Roots of Herbaceous Plants in Agricultural and Grassland Ecosystems Are Dominated by Serendipita herbamans sp. nov
Source: PLoS One. 2014 Apr 17;9(4):e94676. doi: 10.1371/journal.pone.0094676 (PMC3990532; doi:10.1371/journal.pone.0094676)
Supplement: Table S2 — Total number of herbaceous plant families sampled to detect the presence of sebacinoid fungi in their roots. (XLS) [file pone.0094676.s002.xls]

## Sheet: Tabelle1
Plant family	Root samples	Positive samples	Percentage positive samples
Apiaceae	8	0	0
Asteraceae	28	3	0.107
Boraginaceae	8	1	0.125
Brassicaceae	10	1	0.1
Caryophyllaceae	13	8	0.615
Convolvulaceae	15	0	0
Fabaceae	158	39	0.247
Geraniaceae	5	0	0
Lamiaceae	76	8	0.105
Plantaginaceae	150	31	0.207
Poaceae	334	34	0.102
Polygonaceae	15	0	0
Primulaceae	1	0	0
Ranunculaceae	115	29	0.252
Rosaceae	27	1	0.037
Rubiaceae	14	1	0.071
Valerianaceae	2	0	0
Total	979	156	0.159
